# Supplementary material for: Secretory proteins are delivered to the septin-organized penetration interface during root infection by Verticillium dahliae
Source: PLOS journal article supplement (doi:10.1371/journal.ppat.1006275), 2017-03-10
Supplement: S10 (10.1371/journal.ppat.1006275.s010) [file journal.ppat.1006275.s010]

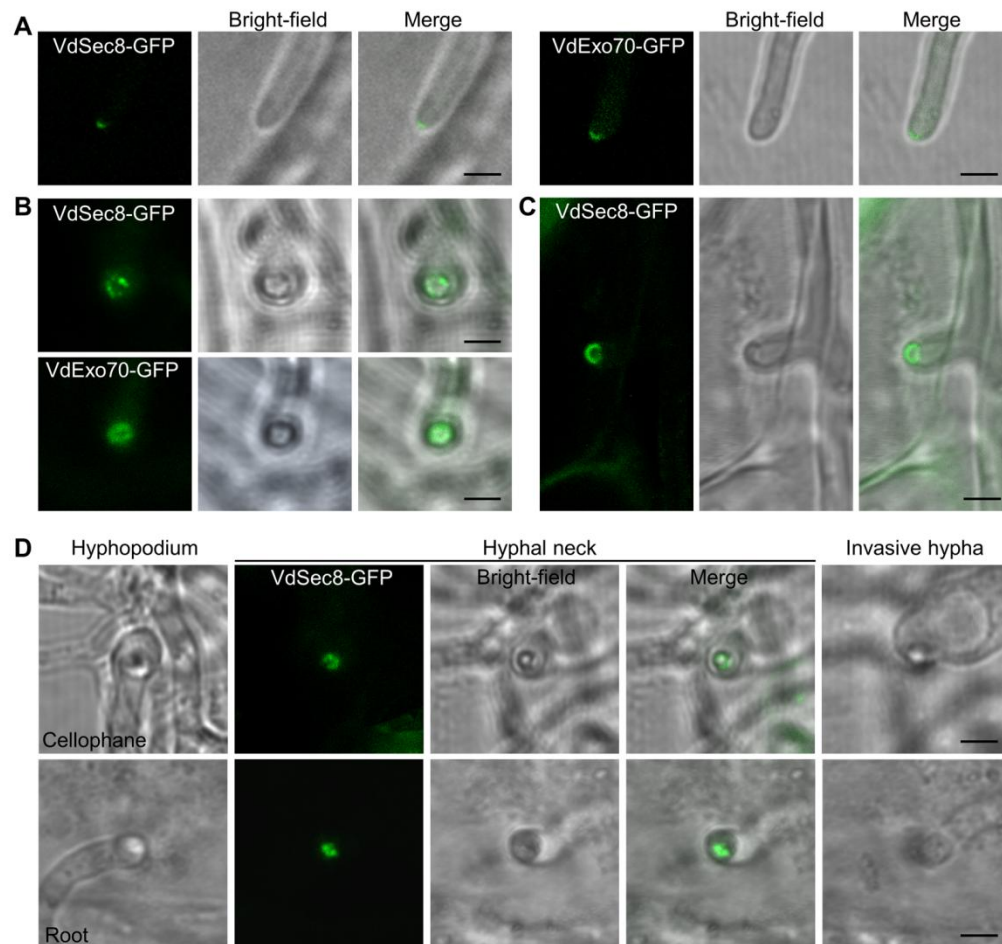

**S10 Fig. Localization of *V. dahliae* exocyst subunits at the hyphal tips, hyphopodium base and hyphal neck.**

(A) Localization of VdSec8-GFP and VdExo70-GFP in the hyphal tips of *V. dahliae* on cellophane. (B) Localization of VdSec8-GFP and VdExo70-GFP at the base of the hyphopodium on cellophane. (C) VdSec8-GFP organized at the base of the hyphopodium on the surface of the root. (D) After invasive hyphae developed, VdSec8-GFP was organized at the hyphal neck on cellophane and plant roots. Bar = 2.5  $\mu\text{m}$ .
